# Supplementary material for: Рождение и ранний период жизни ребенка в Древней Руси xi xiii веков: методы ухода, обрядовая защита, ценностные приоритеты∗
Source: Frontiers journal article supplement (doi:10.3389/fneur.2022.1036891), 2007-01-01
Supplement: Table_1.pdf [file Table_1.pdf]

## Supplementary Table 1. Certainty of evidence according to GRADE: Influence of PES on SEP latency and amplitude of median nerve and tibial nerve

**Patients or population:** Stroke patients or healthy volunteers

**Settings:** Somatosensory evoked potentials

**Intervention:** Peripheral electrical stimulation

**Comparison:** No PES intervention, placebo, or control group

| Outcomes                                          | Number of participants (studies)                                                                                            | Quality of evidence (Grade)                                                                               |
|---------------------------------------------------|-----------------------------------------------------------------------------------------------------------------------------|-----------------------------------------------------------------------------------------------------------|
| Stroke patients<br><b>Amp N20/P25/UL</b> (1–3)    | Case-matched studies:<br>N=20 (1)<br>N=23 (2)<br>N=29 (3)                                                                   | Very low ⊕○○○<br>Study design and risk of bias (1–3)<br>Indirectness of evidence (3)                      |
| Stroke patients<br><b>Lat N20/UL</b> (1–3)        | Case-matched studies:<br>N=20 (1)<br>N=23 (2)<br>N=29 (3)                                                                   | Very low ⊕○○○<br>Study design and risk of bias (1–3)<br>Indirectness of evidence (3)                      |
| Healthy volunteers<br><b>Amp N20/P25/UL</b> (4–7) | One-group; pre-post test<br>N=12 (4)<br>N=13 (6)<br>N=20 (5)<br>N=15 (7)                                                    | Very low ⊕○○○<br>Study design and risk of bias (4–7)<br>Imprecision (4–7)<br>Indirectness of evidence (5) |
| Stroke patients<br><b>Amp P40/LL</b> (3,8)        | Case-matched study<br>N=29 (3)<br>N=90 (8)                                                                                  | Very low ⊕○○○<br>Study design, risk of bias and indirectness of evidence (3,8)                            |
| Stroke patients<br><b>Lat P40/LL</b> (3,8)        | Case-matched study<br>N=29 (3)<br>N=90 (8)                                                                                  | Very low ⊕○○○<br>Study design, risk of bias and indirectness of evidence (3,8)                            |
| Healthy volunteers<br><b>Amp N100/UL</b> (9,10)   | Case-matched study<br>three group; pre-post test<br>N=32 (9)<br>Case-matched study<br>two group; pre-post test<br>N=40 (10) | Very low ⊕○○○<br>Study design and risk of bias, imprecision (9,10)                                        |
| Healthy volunteers<br><b>Lat N100/UL</b> (9,10)   | Case-matched study<br>three group; pre-post test<br>N=32 (9)<br>Case-matched study<br>two group; pre-post test<br>N=40 (10) | Very low ⊕○○○<br>Study design and risk of bias, imprecision (9,10)                                        |

**Abbreviations:** UL, Upper limb; LL, Lower limb; Amp, Amplitude; Lat, Latency

## Reference:

1. Giaquinto S, Mascio M, Fraioli L. The physiopathological bases of recovery processes: The bases of stroke rehabilitation. The cassino project. *Clin Exp Hypertens*. 2002;24(7–8):543–53.
2. Tashiro S, Mizuno K, Kawakami M, Takahashi O, Nakamura T, Suda M, et al. Neuromuscular electrical stimulation-enhanced rehabilitation is associated with not only motor but also somatosensory cortical plasticity in chronic stroke patients: an interventional study. *Ther Adv Chronic Dis*. 2019;10.
3. Peurala SH, Pitkänen K, Sivenius J, Tarkka IM. Cutaneous electrical stimulation may enhance sensorimotor recovery in chronic stroke. *Clin Rehabil*. 2002;16(7):709–16.
4. Cogiamanian F, Vergari M, Pulecchi F, Marceglia S, Priori A. Effect of spinal transcutaneous direct current stimulation on somatosensory evoked potentials in humans. *Clin Neurophysiol* [Internet]. 2008;119(11):2636–40. Available from: <http://dx.doi.org/10.1016/j.clinph.2008.07.249>
5. Kang YT, Liao YS, Hsieh CL. Different effects of transcutaneous electric nerve stimulation and electroacupuncture at ST36-ST37 on the cerebral cortex. *Acupunct Med*. 2015;33(1):36–41.
6. Schabrun SM, Ridding MC, Galea MP, Hodges PW, Chipchase LS. Primary Sensory and Motor Cortex Excitability Are Co-Modulated in Response to Peripheral Electrical Nerve Stimulation. *PLoS One*. 2012;7(12):1–7.
7. Rocchi L, Erro R, Antelmi E, Berardelli A, Tinazzi M, Liguori R, et al. High frequency somatosensory stimulation increases sensori-motor inhibition and leads to perceptual improvement in healthy subjects. *Clin Neurophysiol* [Internet]. 2017;128(6):1015–25. Available from: <http://dx.doi.org/10.1016/j.clinph.2017.03.046>
8. Bao X, Luo JN, Shao YC, Tang ZQ, Liu HY, Liu H, et al. Effect of functional electrical stimulation plus body weight-supported treadmill training for gait rehabilitation in patients with poststroke: A retrospective case-matched study. *Eur J Phys Rehabil Med*. 2020;56(1):34–40.
9. Ashton H, Golding JF, Marsh VR, Thompson JW. Effects of transcutaneous electrical nerve stimulation and aspirin on late somatosensory evoked potentials in normal subjects. *Pain*. 1984;18(4):377–86.
10. Zarei AA, Jadidi AF, Lontis ER, Jensen W. Short-term suppression of somatosensory evoked potentials and perceived sensations in healthy subjects following tens. *IEEE Trans Biomed Eng*. 2021;68(7):2261–9.
